# Supplementary material
Source: publisher site journal article supplement (https://www.jstage.jst.go.jp/article/geochemj/57/6/57_GJ23017/_supplement/_download/57_GJ23017_1.pdf)
Supplement: Supplementary file 1 [file 57_GJ23017_1.pdf]

1 **Supplementary materials for “REE geochemistry of conodont fossils from pelagic**  
2 **deep-sea sedimentary rocks”**

3

4 **Authors:** Hironao Matsumoto<sup>1\*</sup>, Satoshi Takahashi<sup>2</sup>, Shun Muto<sup>3</sup>, Tsuyoshi Iizuka<sup>2</sup>

5

6 **Affiliations:**

7 <sup>1</sup>Japan Agency for Marine-Earth Science and Technology, 2-15, Natsushima, Yokosuka,  
8 Kanagawa, 237-0061, Japan

9 <sup>2</sup>Department of Earth and Planetary Science, University of Tokyo, Hongo 7-3-1, Tokyo,  
10 Japan

11 <sup>3</sup>Geological Survey of Japan, AIST, 1-1-1 Higashi, Tsukuba, Ibaraki 305-8567 Japan.

12

13

14

15

Table S1. Standard materials for the EPMA analysis

(a) Spot analysis

| Measured element | Standard material                                                   | Characteristic X-ray | WDS  |
|------------------|---------------------------------------------------------------------|----------------------|------|
| F                | CaF                                                                 | K $\alpha$           | LDEI |
| Na               | NaAlSi <sub>3</sub> O <sub>8</sub>                                  | K $\alpha$           | TAPH |
| Mg               | MgO                                                                 | K $\alpha$           | TAPH |
| Al               | Al <sub>2</sub> O <sub>3</sub>                                      | K $\alpha$           | TAPH |
| Si               | CaSiO <sub>3</sub>                                                  | K $\alpha$           | PETJ |
| P                | LaPO <sub>4</sub>                                                   | K $\alpha$           | PETJ |
| S                | SrSO <sub>4</sub>                                                   | K $\alpha$           | PETJ |
| Cl               | Na <sub>4</sub> Al <sub>3</sub> (SiO <sub>4</sub> ) <sub>3</sub> Cl | K $\alpha$           | PETJ |
| K                | KAlSi <sub>3</sub> O <sub>8</sub>                                   | K $\alpha$           | PETJ |
| Ca               | CaSiO <sub>3</sub>                                                  | K $\alpha$           | PETJ |
| Ti               | TiO <sub>2</sub>                                                    | K $\alpha$           | PETJ |
| Mn               | MnO                                                                 | K $\alpha$           | LIFH |
| Fe               | Fe <sub>2</sub> O <sub>3</sub>                                      | K $\alpha$           | LIFH |
| Sr               | SrBaNb <sub>4</sub> O <sub>12</sub>                                 | L $\alpha$           | PETJ |
| Y                | Y <sub>3</sub> Al <sub>5</sub> O <sub>12</sub>                      | L $\alpha$           | PETJ |
| La               | LaPO <sub>4</sub>                                                   | L $\alpha$           | LIFH |
| Ce               | CePO <sub>4</sub>                                                   | L $\alpha$           | LIFH |
| Pr               | PrPO <sub>4</sub>                                                   | L $\beta$            | LIFH |
| Nd               | NdPO <sub>4</sub>                                                   | L $\beta$            | LIFH |
| Pb               | Pb, V, and Ge oxide                                                 | M $\alpha$           | PETJ |
| Th               | ThO <sub>2</sub>                                                    | M $\alpha$           | PETJ |
| U                | UO <sub>2</sub>                                                     | M $\beta$            | PETJ |

(b) Element mapping

| Measured element | Standard material                              | Characteristic X-ray | WDS  |
|------------------|------------------------------------------------|----------------------|------|
| F                | CaF                                            | K $\alpha$           | LDEI |
| Si               | CaSiO <sub>3</sub>                             | K $\alpha$           | TAP  |
| P                | LaPO <sub>4</sub>                              | K $\alpha$           | PETJ |
| Ca               | CaSiO <sub>3</sub>                             | K $\alpha$           | PETJ |
| Sr               | SrBaNb <sub>4</sub> O <sub>12</sub>            | L $\alpha$           | TAP  |
| Y                | Y <sub>3</sub> Al <sub>5</sub> O <sub>12</sub> | L $\alpha$           | PETH |
| Nd               | NdPO <sub>4</sub>                              | L $\beta$            | LIFH |
| Th               | ThO <sub>2</sub>                               | M $\alpha$           | PETJ |

Note : WDS=Wavelength Dispersive X-ray Spectrometer

16

17



Table S3

Major elemental concentration of conodont fossils from the Taho area

| Sample ID | Section | Age            | Lithology | Na <sub>2</sub> O<br>(wt%) | MgO<br>(wt%) | Al <sub>2</sub> O <sub>3</sub><br>(wt%) | F<br>(wt%) | Cl<br>(wt%) | PbO<br>(wt%) | SO <sub>3</sub><br>(wt%) | P <sub>2</sub> O <sub>5</sub><br>(wt%) | Y <sub>2</sub> O <sub>3</sub><br>(wt%) | SiO<br>(wt%) | SiO <sub>2</sub><br>(wt%) | K <sub>2</sub> O<br>(wt%) | CaO<br>(wt%) | TiO <sub>2</sub><br>(wt%) | UO <sub>2</sub><br>(wt%) | ThO <sub>2</sub><br>(wt%) | La <sub>2</sub> O <sub>3</sub><br>(wt%) | Ce <sub>2</sub> O <sub>3</sub><br>(wt%) | Pr <sub>2</sub> O <sub>3</sub><br>(wt%) | Nd <sub>2</sub> O <sub>3</sub><br>(wt%) | MnO<br>(wt%) | FeO<br>(wt%) | Total<br>(wt%) |      |      |
|-----------|---------|----------------|-----------|----------------------------|--------------|-----------------------------------------|------------|-------------|--------------|--------------------------|----------------------------------------|----------------------------------------|--------------|---------------------------|---------------------------|--------------|---------------------------|--------------------------|---------------------------|-----------------------------------------|-----------------------------------------|-----------------------------------------|-----------------------------------------|--------------|--------------|----------------|------|------|
| TC61_01   | Taho    | Early Triassic | Limestone | 0.07                       | 0.02         | BDL                                     | 3.84       | BDL         | BDL          | BDL                      | 41.3                                   | 0.05                                   | 0.21         | 0.02                      | BDL                       | 53.7         | 0.04                      | BDL                      | 0.08                      | BDL                                     | 0.06                                    | BDL                                     | BDL                                     | BDL          | BDL          | BDL            | 97.7 |      |
| TC61_02   | Taho    | Early Triassic | Limestone | 0.13                       | 0.02         | BDL                                     | 3.56       | 0.01        | BDL          | 0.06                     | 41.3                                   | BDL                                    | 0.18         | BDL                       | BDL                       | 53.9         | BDL                       | BDL                      | BDL                       | BDL                                     | BDL                                     | BDL                                     | 0.05                                    | BDL          | BDL          | BDL            | 97.9 |      |
| TC61_03   | Taho    | Early Triassic | Limestone | 0.33                       | BDL          | BDL                                     | 3.98       | BDL         | 0.05         | 0.14                     | 40.2                                   | BDL                                    | 0.09         | BDL                       | BDL                       | 52.9         | BDL                       | 0.10                     | BDL                       | BDL                                     | BDL                                     | BDL                                     | 0.14                                    | 0.03         | 0.03         | 96.4           |      |      |
| TC61_04   | Taho    | Early Triassic | Limestone | 0.28                       | 0.06         | 0.03                                    | 3.91       | 0.01        | 0.09         | 0.05                     | 40.7                                   | BDL                                    | 0.23         | BDL                       | BDL                       | 53.4         | BDL                       | BDL                      | 0.05                      | BDL                                     | 0.12                                    | 0.08                                    | 0.05                                    | BDL          | BDL          | BDL            | 97.4 |      |
| TC61_05   | Taho    | Early Triassic | Limestone | 0.14                       | 0.04         | 0.02                                    | 3.97       | BDL         | 0.05         | 0.09                     | 41.1                                   | BDL                                    | 0.23         | BDL                       | BDL                       | 54.1         | BDL                       | BDL                      | BDL                       | BDL                                     | 0.04                                    | BDL                                     | BDL                                     | BDL          | BDL          | BDL            | 98.1 |      |
| TC61_06   | Taho    | Early Triassic | Limestone | 0.34                       | 0.08         | BDL                                     | 3.84       | 0.01        | BDL          | 0.04                     | 40.8                                   | BDL                                    | 0.06         | BDL                       | BDL                       | 53.8         | BDL                       | BDL                      | 0.08                      | 0.03                                    | BDL                                     | 0.12                                    | BDL                                     | 0.04         | BDL          | BDL            | 97.7 |      |
| TC60_01   | Taho    | Early Triassic | Limestone | 0.21                       | 0.04         | 0.03                                    | 4.33       | 0.03        | BDL          | 0.14                     | 40.8                                   | BDL                                    | 0.27         | 0.04                      | 0.02                      | 54.0         | BDL                       | BDL                      | BDL                       | BDL                                     | BDL                                     | BDL                                     | BDL                                     | BDL          | BDL          | 0.04           | 98.1 |      |
| TC60_02   | Taho    | Early Triassic | Limestone | 0.12                       | BDL          | BDL                                     | 4.19       | 0.03        | 0.10         | 0.08                     | 41.7                                   | BDL                                    | 0.19         | BDL                       | BDL                       | 54.4         | BDL                       | 0.09                     | BDL                       | BDL                                     | 0.08                                    | BDL                                     | BDL                                     | 0.02         | BDL          | BDL            | 99.3 |      |
| TC60_03   | Taho    | Early Triassic | Limestone | BDL                        | BDL          | BDL                                     | 3.98       | BDL         | BDL          | BDL                      | 40.5                                   | BDL                                    | 0.22         | BDL                       | BDL                       | 54.7         | BDL                       | 0.24                     | BDL                       | BDL                                     | BDL                                     | BDL                                     | 0.11                                    | BDL          | BDL          | BDL            | 98.1 |      |
| TC60_04   | Taho    | Early Triassic | Limestone | BDL                        | BDL          | BDL                                     | 3.75       | 0.01        | 0.07         | 0.05                     | 41.0                                   | BDL                                    | 0.28         | BDL                       | BDL                       | 54.6         | BDL                       | BDL                      | BDL                       | BDL                                     | 0.03                                    | 0.10                                    | BDL                                     | BDL          | BDL          | BDL            | 98.3 |      |
| TC60_05   | Taho    | Early Triassic | Limestone | 0.05                       | BDL          | BDL                                     | 3.83       | 0.02        | BDL          | 0.07                     | 41.1                                   | BDL                                    | 0.14         | 0.03                      | BDL                       | 54.2         | BDL                       | BDL                      | BDL                       | BDL                                     | BDL                                     | BDL                                     | BDL                                     | BDL          | BDL          | 0.04           | 97.9 |      |
| TC60_06   | Taho    | Early Triassic | Limestone | BDL                        | BDL          | BDL                                     | 3.79       | 0.01        | BDL          | 0.07                     | 41.1                                   | 0.06                                   | 0.19         | 0.02                      | BDL                       | 54.8         | BDL                       | BDL                      | 0.10                      | 0.04                                    | BDL                                     | BDL                                     | 0.13                                    | BDL          | BDL          | BDL            | 98.7 |      |
| TC60_07   | Taho    | Early Triassic | Limestone | 0.16                       | 0.02         | BDL                                     | 4.07       | 0.03        | BDL          | 0.15                     | 41.1                                   | BDL                                    | 0.16         | 0.03                      | BDL                       | 53.4         | BDL                       | BDL                      | BDL                       | BDL                                     | 0.07                                    | BDL                                     | BDL                                     | BDL          | BDL          | BDL            | 97.6 |      |
| TC60_08   | Taho    | Early Triassic | Limestone | 0.17                       | 0.03         | BDL                                     | 3.98       | 0.02        | BDL          | 0.09                     | 41.1                                   | BDL                                    | 0.23         | 0.03                      | BDL                       | 54.2         | BDL                       | 0.09                     | 0.12                      | BDL                                     | BDL                                     | 0.13                                    | BDL                                     | 0.03         | 0.05         | 98.6           |      |      |
| TC60_09   | Taho    | Early Triassic | Limestone | 0.16                       | BDL          | BDL                                     | 4.42       | 0.06        | BDL          | 0.13                     | 40.7                                   | BDL                                    | 0.11         | BDL                       | BDL                       | 53.6         | BDL                       | BDL                      | 0.07                      | BDL                                     | 0.03                                    | BDL                                     | BDL                                     | BDL          | BDL          | BDL            | 97.5 |      |
| TC60_10   | Taho    | Early Triassic | Limestone | 0.17                       | 0.03         | BDL                                     | 4.33       | 0.02        | BDL          | 0.05                     | 40.2                                   | BDL                                    | 0.20         | 0.04                      | BDL                       | 53.6         | BDL                       | BDL                      | BDL                       | 0.05                                    | BDL                                     | BDL                                     | BDL                                     | BDL          | BDL          | BDL            | 97.0 |      |
| TC21_01   | Taho    | Early Triassic | Limestone | 0.22                       | 0.04         | BDL                                     | 4.23       | 0.01        | 0.05         | 0.07                     | 41.0                                   | BDL                                    | 0.10         | 0.03                      | BDL                       | 53.4         | BDL                       | BDL                      | BDL                       | 0.05                                    | BDL                                     | 0.07                                    | BDL                                     | BDL          | BDL          | BDL            | 97.6 |      |
| TC21_02   | Taho    | Early Triassic | Limestone | 0.08                       | BDL          | BDL                                     | 3.94       | 0.03        | BDL          | 0.09                     | 40.4                                   | BDL                                    | 0.06         | BDL                       | BDL                       | 54.0         | BDL                       | BDL                      | 0.09                      | BDL                                     | BDL                                     | BDL                                     | 0.07                                    | BDL          | 0.06         | 97.2           |      |      |
| TC21_03   | Taho    | Early Triassic | Limestone | 0.15                       | BDL          | BDL                                     | 3.93       | 0.03        | BDL          | 0.15                     | 40.9                                   | BDL                                    | 0.16         | BDL                       | BDL                       | 53.5         | 0.03                      | BDL                      | BDL                       | BDL                                     | 0.04                                    | 0.11                                    | BDL                                     | BDL          | BDL          | BDL            | 97.4 |      |
| TC21_04   | Taho    | Early Triassic | Limestone | 0.22                       | BDL          | BDL                                     | 4.18       | 0.05        | BDL          | 0.10                     | 40.0                                   | BDL                                    | 0.20         | BDL                       | BDL                       | 54.0         | BDL                       | BDL                      | BDL                       | BDL                                     | 0.07                                    | BDL                                     | BDL                                     | BDL          | BDL          | BDL            | 97.2 |      |
| TC21_05   | Taho    | Early Triassic | Limestone | 0.22                       | 0.08         | BDL                                     | 3.89       | 0.03        | 0.09         | 0.15                     | 40.5                                   | BDL                                    | 0.19         | BDL                       | BDL                       | 53.9         | BDL                       | BDL                      | 0.05                      | BDL                                     | BDL                                     | BDL                                     | BDL                                     | BDL          | BDL          | BDL            | 0.04 | 97.5 |
| TC35_01   | Taho    | Early Triassic | Limestone | 0.04                       | BDL          | BDL                                     | 3.96       | BDL         | BDL          | 0.04                     | 41.3                                   | BDL                                    | 0.16         | 0.04                      | BDL                       | 54.2         | BDL                       | BDL                      | BDL                       | BDL                                     | BDL                                     | BDL                                     | BDL                                     | BDL          | BDL          | BDL            | 98.1 |      |
| TC35_02   | Taho    | Early Triassic | Limestone | 0.03                       | 0.03         | BDL                                     | 3.79       | 0.02        | BDL          | 0.05                     | 41.6                                   | BDL                                    | 0.23         | 0.04                      | BDL                       | 53.8         | BDL                       | BDL                      | BDL                       | BDL                                     | BDL                                     | BDL                                     | BDL                                     | BDL          | BDL          | BDL            | 98.1 |      |
| TC35_03   | Taho    | Early Triassic | Limestone | BDL                        | 0.03         | BDL                                     | 4.15       | 0.02        | 0.06         | 0.04                     | 41.1                                   | BDL                                    | 0.06         | BDL                       | BDL                       | 53.9         | BDL                       | BDL                      | 0.07                      | BDL                                     | BDL                                     | BDL                                     | BDL                                     | BDL          | BDL          | BDL            | 0.03 | 97.7 |
| TC35_04   | Taho    | Early Triassic | Limestone | 0.04                       | BDL          | BDL                                     | 3.87       | BDL         | 0.05         | 0.07                     | 41.9                                   | BDL                                    | 0.12         | BDL                       | BDL                       | 54.4         | BDL                       | BDL                      | BDL                       | BDL                                     | 0.14                                    | BDL                                     | 0.05                                    | 0.03         | 99.1         |                |      |      |
| TC35_05   | Taho    | Early Triassic | Limestone | 0.13                       | 0.04         | BDL                                     | 3.78       | 0.02        | BDL          | 0.18                     | 40.5                                   | BDL                                    | 0.23         | BDL                       | BDL                       | 53.8         | BDL                       | BDL                      | BDL                       | BDL                                     | 0.06                                    | 0.07                                    | 0.08                                    | 0.04         | 0.05         | 97.5           |      |      |
| TC35_06   | Taho    | Early Triassic | Limestone | 0.13                       | 0.05         | BDL                                     | 3.76       | 0.06        | BDL          | 0.14                     | 41.8                                   | BDL                                    | 0.07         | 0.03                      | BDL                       | 53.7         | BDL                       | BDL                      | BDL                       | BDL                                     | 0.03                                    | BDL                                     | BDL                                     | BDL          | BDL          | BDL            | 98.2 |      |
| TC35_07   | Taho    | Early Triassic | Limestone | 0.11                       | 0.05         | BDL                                     | 3.88       | 0.02        | BDL          | 0.10                     | 40.8                                   | BDL                                    | 0.19         | 0.06                      | BDL                       | 53.7         | 0.06                      | BDL                      | BDL                       | BDL                                     | BDL                                     | 0.11                                    | 0.13                                    | 0.03         | 0.03         | 97.7           |      |      |

Note: BDL—below detection limit

20

21



Table S5

Rare earth element concentrations of conodonts from Tabo Limestone

| Sample ID | Age            | Y 2SE<br>(ppm) | La 2SE<br>(ppm) | Ce 2SE<br>(ppm) | Pr 2SE<br>(ppm) | Nd 2SE<br>(ppm) | Sm 2SE<br>(ppm) | Eu 2SE<br>(ppm) | Gd 2SE<br>(ppm) | Tb 2SE<br>(ppm) | Dy 2SE<br>(ppm) | Ho 2SE<br>(ppm) | Er 2SE<br>(ppm) | Tm 2SE<br>(ppm) | Yb 2SE<br>(ppm) | Lu 2SE<br>(ppm) | ΣREE 2SE<br>(ppm) | Ce/Ce* 2SE | Y/Ho 2SE |     |     |      |      |      |      |      |      |     |     |      |      |      |     |      |      |    |    |
|-----------|----------------|----------------|-----------------|-----------------|-----------------|-----------------|-----------------|-----------------|-----------------|-----------------|-----------------|-----------------|-----------------|-----------------|-----------------|-----------------|-------------------|------------|----------|-----|-----|------|------|------|------|------|------|-----|-----|------|------|------|-----|------|------|----|----|
| TC42_2    | Lower Triassic | 36             | 5               | 21              | 3               | 29              | 4               | 5.6             | 1.0             | 25              | 4               | 5               | 2               | 0.8             | 0.2             | 4.4             | 1.3               | 0.68       | 0.17     | 2.3 | 0.5 | 0.39 | 0.07 | 1.5  | 0.4  | 0.24 | 0.09 | 0.7 | 0.3 | 0.10 | 0.06 | 133  | 9   | 0.61 | 0.11 | 91 | 4  |
| TC60_1    | Lower Triassic | 6.2            | 0.6             | 6.1             | 0.6             | 7.1             | 0.6             | 1.4             | 0.1             | 5.2             | 0.6             | 0.9             | 0.2             | 0.18            | 0.07            | 0.5             | 0.2               | 0.06       | 0.02     | 0.4 | 0.1 | 0.09 | 0.03 | 0.21 | 0.06 | 0.03 | 0.01 | BDL | -   | 0.02 | 0.01 | 28.4 | 1.3 | 0.57 | 0.06 | 66 | 10 |
| TC60_2    | Lower Triassic | 12             | 2               | 14              | 3               | 21              | 6               | 2.9             | 0.5             | 12              | 2               | 1.3             | 0.5             | 0.50            | 0.15            | 2.2             | 0.7               | 0.26       | 0.10     | 1.3 | 0.5 | 0.26 | 0.08 | 0.6  | 0.3  | 0.08 | 0.03 | 0.5 | 0.3 | 0.03 | 0.02 | 68   | 7   | 0.7  | 0.2  | 45 | 6  |
| TC35_01   | Lower Triassic | 20             | 3               | 53              | 13              | 90              | 59              | 14              | 3               | 47              | 5               | 6.8             | 1.2             | 1.1             | 0.2             | 5.1             | 1.7               | 0.7        | 0.2      | 2.5 | 0.8 | 0.39 | 0.11 | 1.09 | 0.15 | 0.13 | 0.07 | 0.8 | 0.3 | 0.09 | 0.04 | 243  | 60  | 0.7  | 0.5  | 52 | 11 |
| TC35_02   | Lower Triassic | 10.3           | 0.9             | 11              | 2               | 17.9            | 1.9             | 4.4             | 0.4             | 19              | 2               | 2.8             | 0.3             | 0.55            | 0.13            | 2.2             | 0.4               | 0.22       | 0.05     | 1.0 | 0.2 | 0.15 | 0.05 | 0.48 | 0.14 | 0.03 | 0.02 | 0.5 | 0.1 | 0.03 | 0.02 | 70   | 4   | 0.60 | 0.08 | 70 | 8  |

Note: BDL=below detection limit

25

26

Table S6

Y/Ho and Ce/Ce\* of siliceous sediments

| Name   | Y/Ho | 2SD | Ce/Ce* | 2SD  |
|--------|------|-----|--------|------|
| N4     | 33   | 12  | 1.2    | 0.16 |
| N3     | 24   | 10  | 1.4    | 0.19 |
| N2     | 29   | 4   | 1.54   | 0.13 |
| N1     | 36   | 13  | 1.5    | 0.4  |
| R3     | 28   | 6   | 2.4    | 0.3  |
| R2     | 31   | 5   | 1.6    | 0.5  |
| R1     | 27   | 6   | 1.3    | 0.3  |
| O1     | 30   | 6   | 1.3    | 0.19 |
| C4     | 21   | 4   | 1.6    | 0.5  |
| C3     | 29   | 6   | 1.2    | 0.15 |
| C2     | 28   | 5   | 1.1    | 0.3  |
| C1     | 30   | 6   | 1.03   | 0.2  |
| M5     | 25   | 6   | 1.0    | 0.2  |
| M4     | 30   | 7   | 0.9    | 0.3  |
| M3     | 32   | 5   | 1.1    | 0.2  |
| M2     | 25   | 9   | 1.1    | 0.2  |
| M1.5   | 26   | 6   | 1.0    | 0.8  |
| M1     | 23   | 7   | 1.1    | 0.4  |
| Mj17_1 | 30   | 4   | 0.92   | 0.2  |
| Mj10   | 25   | 2   | 0.97   | 0.12 |
| Mj9    | 26   | 2   | 0.97   | 0.09 |
| Mj8_2  | 28   | 4   | 0.9    | 0.13 |
| Mj8    | 24   | 8   | 0.9    | 0.2  |
| Mj7    | 23   | 12  | 1.0    | 0.10 |
| Mj6    | 33   | 13  | 0.99   | 0.10 |
| Mj5    | 26   | 2   | 0.9    | 0.16 |
| Mj4    | 29   | 5   | 1.0    | 0.16 |
| Mj3    | 28   | 3   | 0.9    | 0.17 |
| Mj2    | 29   | 5   | 0.87   | 0.11 |
| Mj1    | 30   | 3   | 0.9    | 0.2  |
| MjL3   | 31   | 4   | 1.0    | 0.18 |
| MjL2   | 35   | 4   | 1.1    | 0.11 |
| MjL1   | 25   | 4   | 0.9    | 0.3  |

7
